# Supplementary material for: Separation and characterization of the active species in Ti-doped NaAlH4
Source: Royal Society of Chemistry journal article supplement (doi:10.1039/c2cc38553h), 2012-12-17
Supplement: c2cc38553h.pdf [file c2cc38553h.pdf]

## Supporting information

### Separation and characterization of the active species in Ti-doped $\text{NaAlH}_4$

Renjin Xiong\*, Ge Sang\*, Xiayan Yan, Guanghui Zhang, Qinying Xu and Huanlin Zhang  
Science and Technology on Surface Physics and Chemistry Laboratory, Mianyang, 621907, China  
E-mail: xrj902@163.com; [angelsg@163.com](mailto:angelsg@163.com)

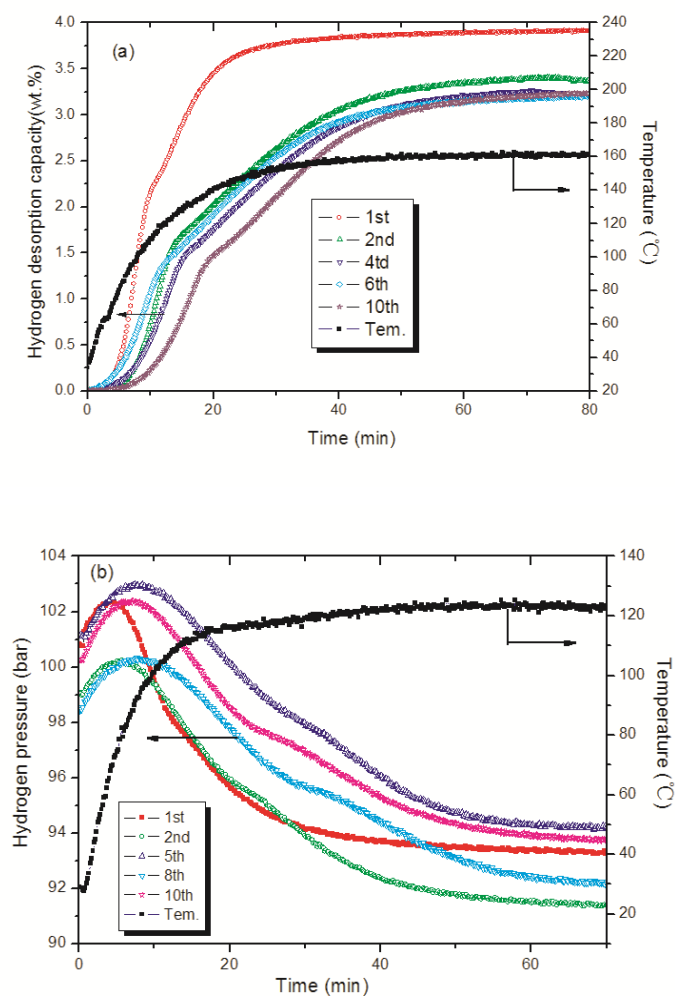

Fig.S1 (a) hydrogen desorption and (b) hydrogen absorption curves of  $\text{NaAlH}_4$  with 10mol% $\text{TiF}_3$  during ten cycles

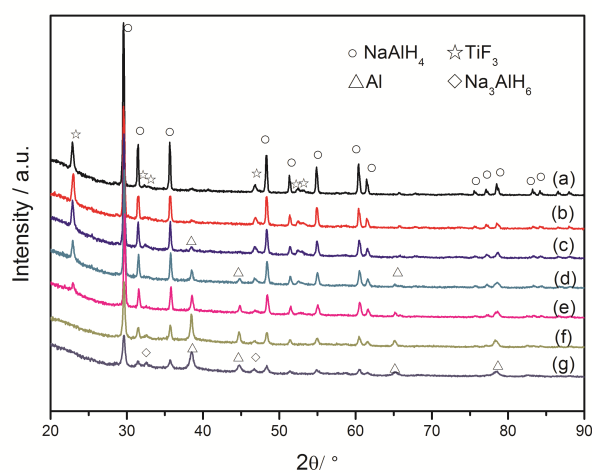

Fig.S2 XRD patterns for  $\text{NaAlH}_4$  with 10mol% $\text{TiF}_3$  after ball milling at different times, (a) 0 min, (b) 15min, (c) 30min, (d) 60min, (e) 90min, (f) 180min, (g) 300min

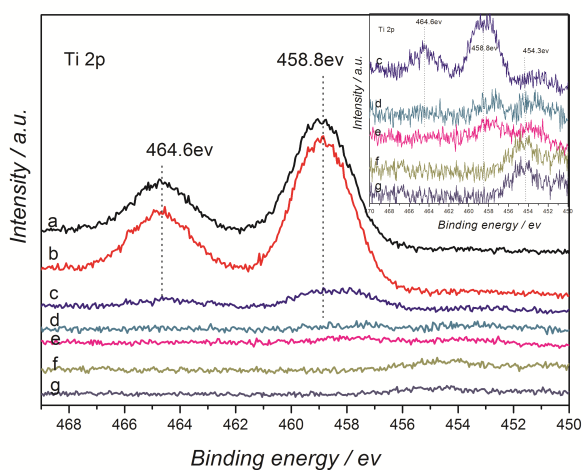

Fig.S3 XPS spectra for  $\text{NaAlH}_4$  with 10mol% $\text{TiF}_3$  after ball milling at different times, (a) 0 min, (b) 15min, (c) 30min, (d) 60min, (e) 90min, (f) 180min, (g) 300min, the inset shows the magnification of XPS spectra

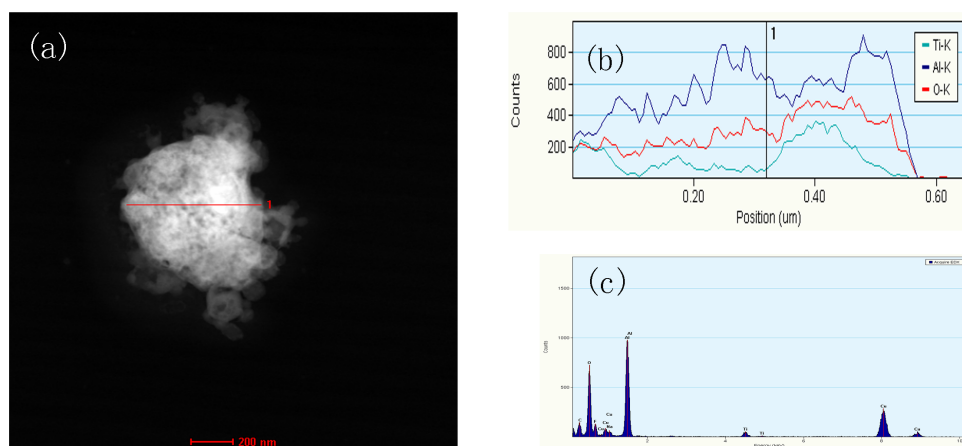

Fig. S4 Energy-dispersive X-ray spectroscopy (EDX) line analyses for Al-Ti-m
